# Supplementary material
Source: Springer Nature journal article supplement (https://www.springermedizin.de/resource/supplementary/12889_2013_6678_MOESM1_ESM.pdf/9498818)
Supplement: MOESM1 [file 9498818]

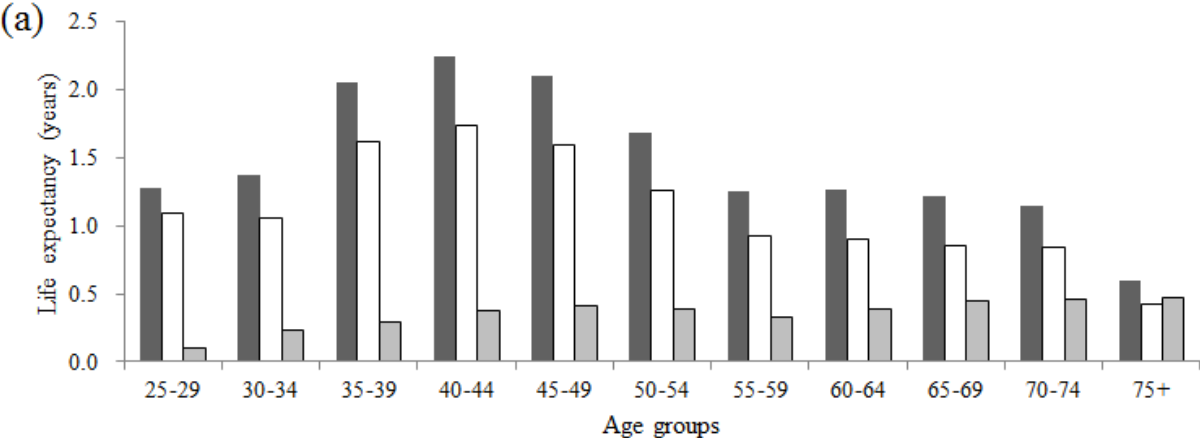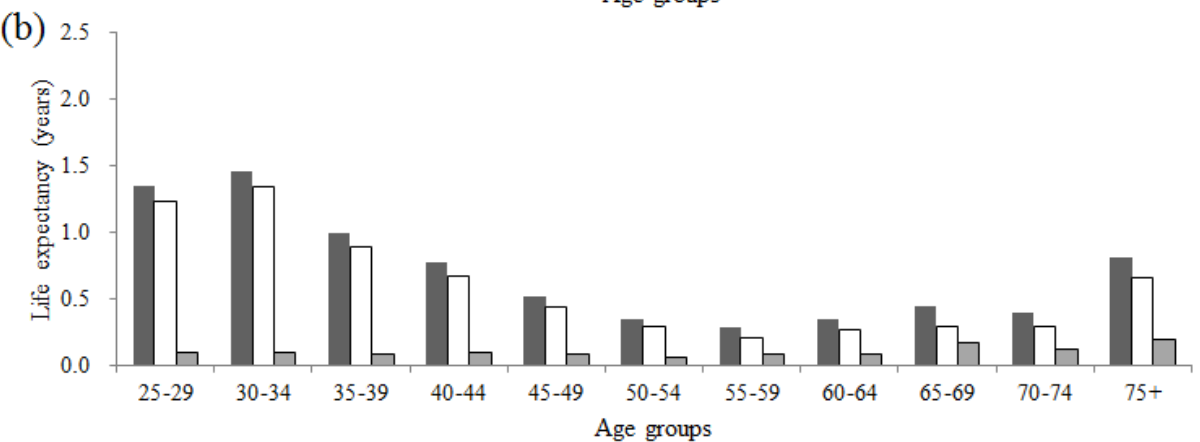

- between college or higher education and elementary or less education
- between middle or high school education and elementary or less education
- ▒ between college or higher education and middle or high school education
